# Supplementary material for: Intrapulmonary administration of recombinant activated factor VII in pediatric, adolescent, and young adult oncology and hematopoietic cell transplant patients with pulmonary hemorrhage
Source: PubMed Central journal article supplement (PMC11055461; doi:10.3389/fonc.2024.1375697), 2024-04-12

Supplemental Figure 2

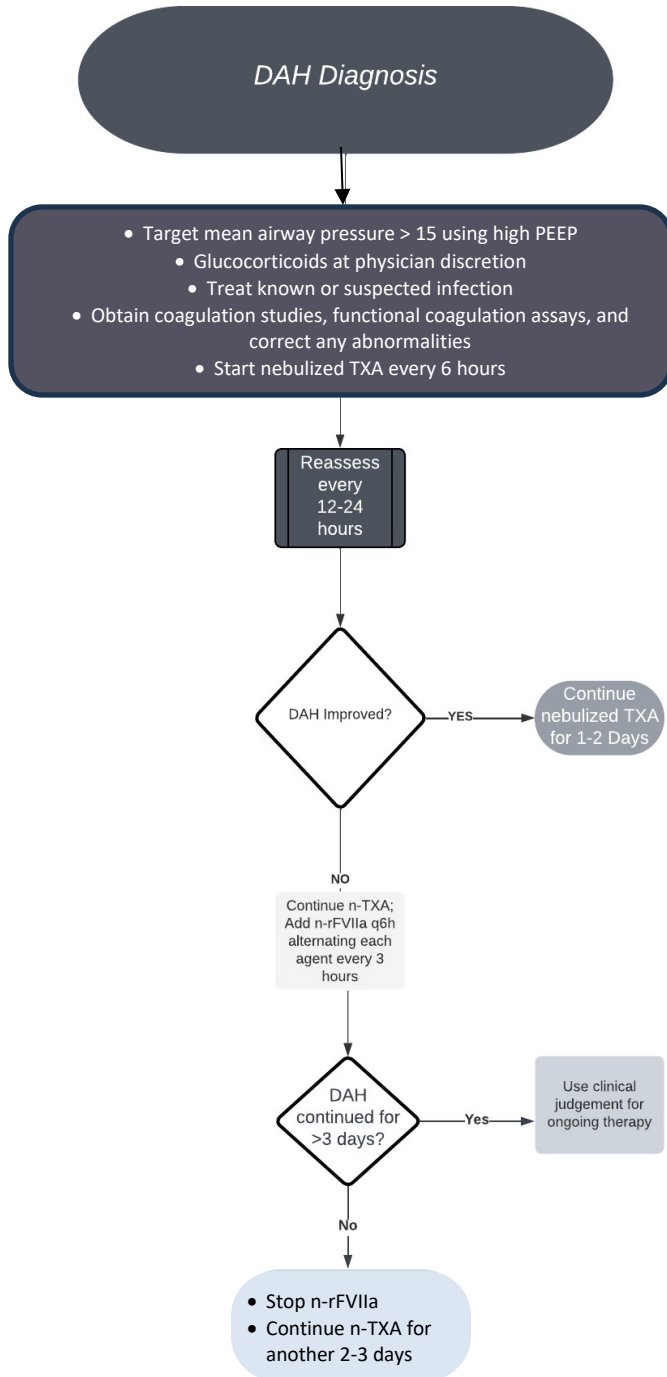

Supplement: DataSheet_1.pdf [file DataSheet_1.pdf]
